# Supplementary material for: Diselenide mediated controlled radical polymerization under visible light irradiation: mechanism investigation and α,ω-ditelechelic polymers
Source: Royal Society of Chemistry journal article supplement (doi:10.1039/c5py00803d), 2015-01-01
Supplement: c5py00803d1.pdf [file c5py00803d1.pdf]

## Supporting Information

# Diselenides Mediated Controlled Radical Polymerization Under Visible Light Irradiation: Mechanism Investigation and $\alpha$ , $\omega$ -Ditelechelic Polymers

*Chunlai Ding, Caiwei Fan, Ganquan Jiang, Jiandong Zhang, Xiaohong Li, Na Li\*,*

*Xiangqiang Pan, Zhengbiao Zhang, Wei Zhang, Jian Zhu\*, and Xiulin Zhu*

Suzhou key Laboratory of Macromolecular Design and Precision Synthesis, Jiangsu Key Laboratory of Advanced Functional Polymer Design and Application, Department of Polymer Science and Engineering, College of Chemistry, Chemical Engineering and Materials Science, Soochow University, Suzhou, 215123, P. R. China

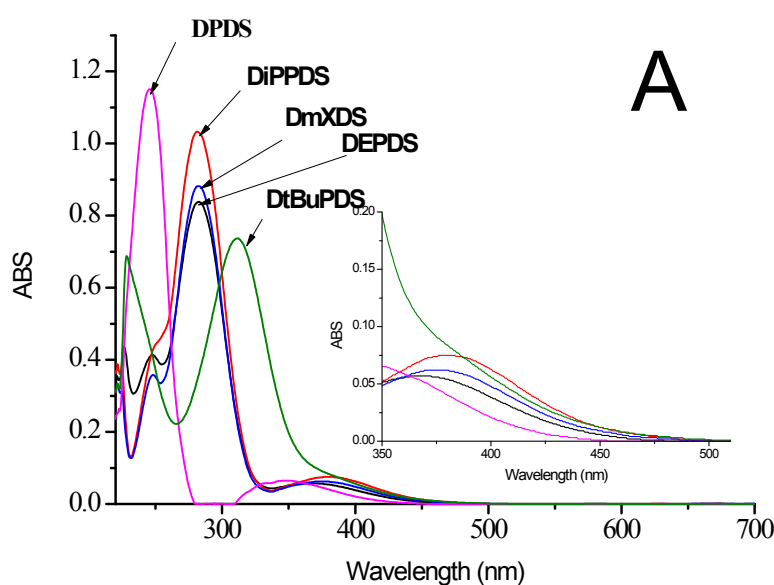

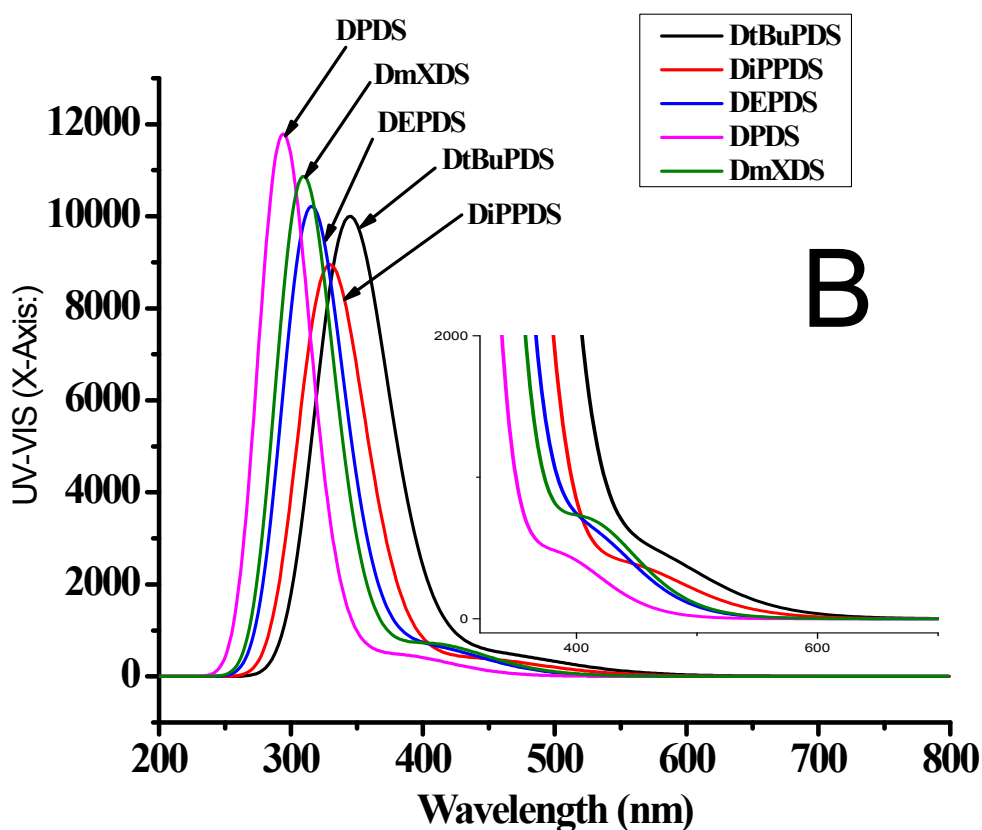

**Figure 1S.** A) The UV-vis spectra of diselenide compounds with different substitution groups on benzene ring in toluene with the concentration of  $1 \times 10^{-4}$  mol/L. B) The UV-vis spectra of diselenides with different substitution groups obtained from time-dependent (TD) DFT calculation.

**Table 1S.** The Gibbs free energy of the radical adding with styrene.

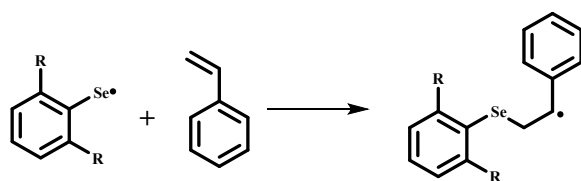

| No. | Mother structure of radical | Gibbs free energy (Kcal/mol) |
|-----|-----------------------------|------------------------------|
| 1   | DPDS                        | 2.95                         |
| 2   | DmXDS                       | 6.66                         |
| 3   | DEPDS                       | 12.11                        |
| 4   | DiPPDS                      | 11.64                        |
| 5   | DtBuPDS                     | 13.72                        |

Minimal structure of radicals generated from diselenide with styrene: calculated using the three parameter hybrid B3LYP density functional method with the extended basis set 6-311++G(d,p) implemented in the GAUSSIAN 09 package.

A). DPDS derived radical with styrene:

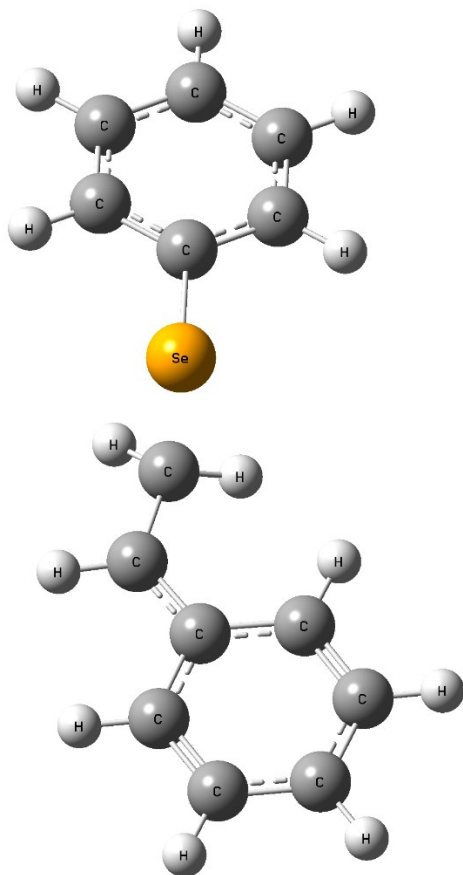

|   |            |             |             |
|---|------------|-------------|-------------|
| C | 5.22046500 | -0.46222900 | -0.09175800 |
| C | 4.02222600 | -1.09949500 | -0.35857700 |
| C | 2.80478500 | -0.37154100 | -0.46612500 |
| C | 2.87014800 | 1.03614000  | -0.27572900 |
| C | 4.07501000 | 1.66335100  | -0.00626700 |
| C | 5.25900000 | 0.92517800  | 0.08515300  |
| H | 6.13377000 | -1.04223900 | -0.01778900 |
| H | 3.99888800 | -2.17577000 | -0.49381900 |
| H | 1.96325300 | 1.62618600  | -0.32522200 |
| H | 4.09775800 | 2.73784300  | 0.13893700  |

|    |             |             |             |
|----|-------------|-------------|-------------|
| H  | 6.19822800  | 1.42331000  | 0.29539700  |
| C  | 1.59883100  | -1.05861900 | -0.75823600 |
| H  | 1.64560700  | -2.14196500 | -0.80819800 |
| C  | 0.27826500  | -0.44529300 | -0.91539600 |
| H  | -0.38536900 | -1.04361900 | -1.53613800 |
| H  | 0.30087800  | 0.58136300  | -1.27379600 |
| Se | -0.69709000 | -0.37449800 | 0.90249100  |
| C  | -2.48099700 | 0.00103700  | 0.23848800  |
| C  | -3.34942500 | -1.04827600 | -0.07867400 |
| C  | -2.91375500 | 1.32296300  | 0.09495200  |
| C  | -4.63534900 | -0.77557600 | -0.54123900 |
| H  | -3.01836600 | -2.07265900 | 0.04362700  |
| C  | -4.20124800 | 1.59056800  | -0.36658300 |
| H  | -2.24514000 | 2.13630000  | 0.35031500  |
| C  | -5.06276800 | 0.54296100  | -0.68622800 |
| H  | -5.30411300 | -1.59413200 | -0.78355400 |
| H  | -4.53090600 | 2.61812400  | -0.47360100 |
| H  | -6.06456400 | 0.75317700  | -1.04352100 |

B) DmXDS derived radical with styrene:

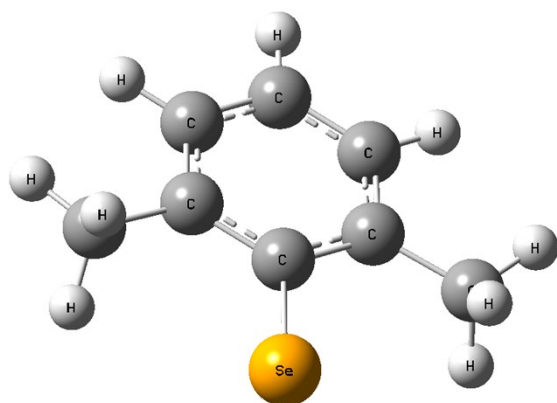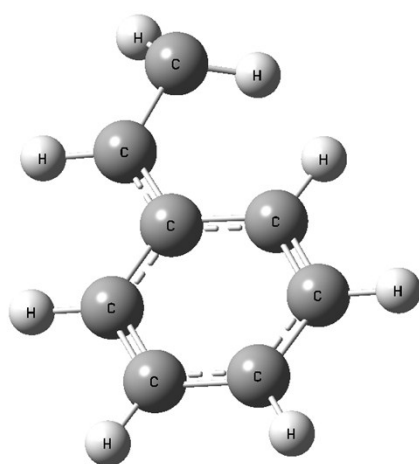

|   |             |             |             |
|---|-------------|-------------|-------------|
| C | -5.45051200 | -0.79054600 | 0.25164900  |
| C | -4.19236900 | -1.14974400 | 0.70017500  |
| C | -3.08203100 | -0.26964400 | 0.57321600  |
| C | -3.31863800 | 0.98901100  | -0.04475600 |
| C | -4.58206100 | 1.33714000  | -0.49292300 |
| C | -5.65816400 | 0.45653800  | -0.34794400 |
| H | -6.27917700 | -1.48104200 | 0.36375000  |
| H | -4.03788600 | -2.11907200 | 1.16250000  |
| H | -2.49801100 | 1.68269700  | -0.18134700 |
| H | -4.73517600 | 2.30172400  | -0.96440800 |
| H | -6.64405800 | 0.73605300  | -0.70057200 |

|    |             |             |             |
|----|-------------|-------------|-------------|
| C  | -1.80963700 | -0.66799800 | 1.05824900  |
| H  | -1.71884300 | -1.68031100 | 1.43896100  |
| C  | -0.58488400 | 0.13088200  | 1.00239500  |
| H  | 0.13541600  | -0.15310500 | 1.76651200  |
| H  | -0.75282000 | 1.20456300  | 1.02478400  |
| Se | 0.42110200  | -0.26387500 | -0.76010100 |
| C  | 2.25970700  | 0.01035500  | -0.17362000 |
| C  | 3.11658000  | -1.10742800 | -0.07814100 |
| C  | 2.73016600  | 1.31118700  | 0.10441600  |
| C  | 4.44347100  | -0.89709400 | 0.30993000  |
| C  | 2.66200300  | -2.51538000 | -0.38316300 |
| C  | 4.06386900  | 1.46889000  | 0.49494200  |
| C  | 1.85574400  | 2.53702700  | -0.00416600 |
| C  | 4.91588300  | 0.37709500  | 0.59883300  |
| H  | 5.11010100  | -1.74941800 | 0.38700600  |
| H  | 1.78440200  | -2.79061100 | 0.20597800  |
| H  | 2.37882700  | -2.62898100 | -1.43317000 |
| H  | 3.46235100  | -3.22691100 | -0.17081000 |
| H  | 4.43440200  | 2.46541200  | 0.71096400  |
| H  | 1.26509700  | 2.52378200  | -0.92237400 |
| H  | 1.15106200  | 2.60275700  | 0.83086400  |
| H  | 2.46406600  | 3.44332800  | 0.01054500  |
| H  | 5.94803200  | 0.51914300  | 0.89968200  |

C) DEPDS derived radical with styrene:

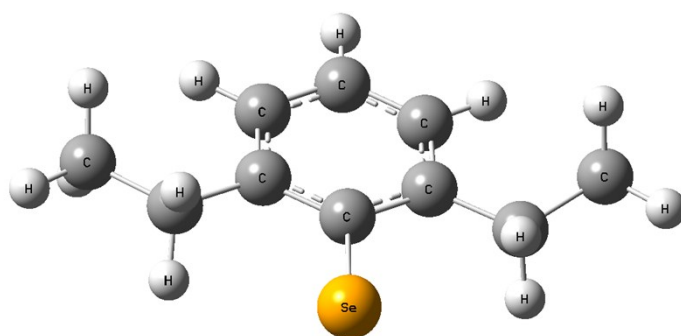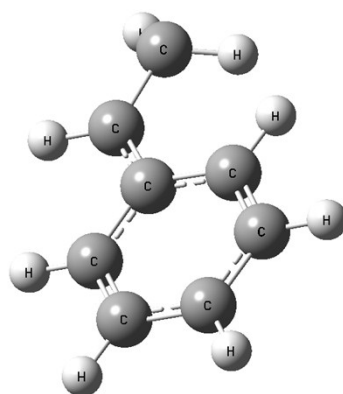

|   |             |             |             |
|---|-------------|-------------|-------------|
| C | -5.72093800 | -0.95006300 | 0.33258300  |
| C | -4.44568200 | -1.20857300 | 0.80156700  |
| C | -3.38016900 | -0.28925300 | 0.59473100  |
| C | -3.67973100 | 0.90024300  | -0.12446500 |
| C | -4.95956500 | 1.14703300  | -0.59319600 |
| C | -5.99091000 | 0.23039000  | -0.36837100 |
| H | -6.51448600 | -1.66816800 | 0.50773300  |
| H | -4.24301900 | -2.12679800 | 1.34286300  |
| H | -2.89467500 | 1.62003500  | -0.32273900 |
| H | -5.16066400 | 2.05991600  | -1.14310700 |
| H | -6.98999000 | 0.43088500  | -0.73727500 |
| C | -2.08867500 | -0.58332400 | 1.10352500  |
| H | -1.94569700 | -1.55660500 | 1.56202100  |
| C | -0.90795600 | 0.27135700  | 0.98018400  |

|    |             |             |             |
|----|-------------|-------------|-------------|
| H  | -1.13212800 | 1.33348500  | 0.92203500  |
| H  | -0.17136300 | 0.08415200  | 1.75853900  |
| Se | 0.11496100  | -0.20323800 | -0.75372300 |
| C  | 1.95888200  | 0.02702000  | -0.15383900 |
| C  | 2.78317600  | -1.11853200 | -0.05525600 |
| C  | 2.45724000  | 1.31900900  | 0.12855100  |
| C  | 4.11021900  | -0.94086800 | 0.34657400  |
| C  | 2.25744000  | -2.50906200 | -0.37999800 |
| C  | 3.79029400  | 1.43709500  | 0.53573400  |
| C  | 1.58508400  | 2.55700700  | 0.00070900  |
| C  | 4.60815100  | 0.32112200  | 0.64528300  |
| H  | 4.76505000  | -1.79830300 | 0.43128300  |
| H  | 1.35434600  | -2.68348300 | 0.21279700  |
| H  | 1.91092000  | -2.51911300 | -1.41888300 |
| C  | 3.23002500  | -3.67273900 | -0.17454400 |
| H  | 4.19766100  | 2.41429600  | 0.76086800  |
| H  | 0.96875000  | 2.44529300  | -0.89572800 |
| H  | 0.87604300  | 2.57663900  | 0.83689000  |
| C  | 2.31526000  | 3.90252600  | -0.04930600 |
| H  | 5.64001300  | 0.43484600  | 0.95954100  |
| H  | 2.73514700  | -4.61396700 | -0.42633200 |
| H  | 4.11417800  | -3.58716500 | -0.81220000 |
| H  | 3.56779800  | -3.74551200 | 0.86309000  |
| H  | 3.04879800  | 3.93078100  | -0.85966400 |
| H  | 1.59613000  | 4.70702300  | -0.22282700 |
| H  | 2.83563200  | 4.12952700  | 0.88488700  |



D) DiPDS derived radicals with styrene:

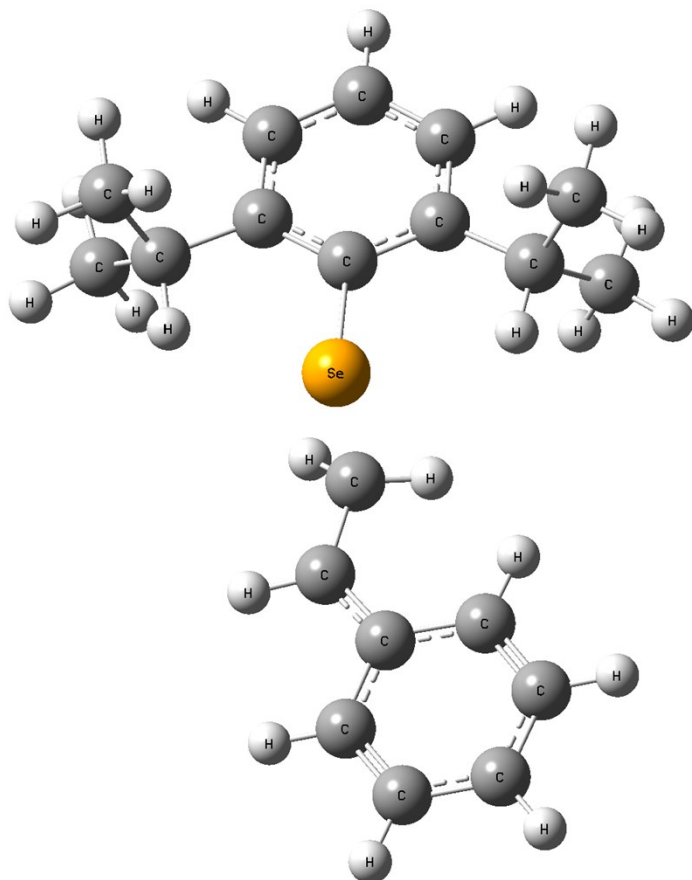

|   |            |             |             |
|---|------------|-------------|-------------|
| C | 5.90151700 | -1.00311100 | 0.00963500  |
| C | 4.65990700 | -1.52855400 | -0.29917500 |
| C | 3.52045900 | -0.69186200 | -0.45910100 |
| C | 3.71117500 | 0.70573800  | -0.27886300 |
| C | 4.95838400 | 1.22086600  | 0.03240200  |
| C | 6.06340300 | 0.37651300  | 0.17730800  |
| H | 6.75279400 | -1.66513400 | 0.12380300  |
| H | 4.54103800 | -2.59947700 | -0.42639300 |
| H | 2.86819200 | 1.37894800  | -0.37427100 |
| H | 5.07647000 | 2.29036100  | 0.16811400  |

|    |             |             |             |
|----|-------------|-------------|-------------|
| H  | 7.03632400  | 0.78720600  | 0.42062500  |
| C  | 2.26722500  | -1.26790300 | -0.78941000 |
| H  | 2.21849900  | -2.35127700 | -0.83742900 |
| C  | 1.01112100  | -0.54071600 | -0.98614000 |
| H  | 1.13415400  | 0.48112900  | -1.33905200 |
| H  | 0.31973800  | -1.07536400 | -1.63425700 |
| Se | -0.01236300 | -0.39450600 | 0.79849200  |
| C  | -1.76250500 | 0.14103000  | 0.09692400  |
| C  | -2.03721600 | 1.51263800  | -0.11869200 |
| C  | -2.75054500 | -0.84575000 | -0.13765800 |
| C  | -3.31866200 | 1.87122400  | -0.55088400 |
| C  | -1.02305700 | 2.62721500  | 0.12399000  |
| C  | -4.01460900 | -0.42625100 | -0.56598600 |
| C  | -2.52116000 | -2.33796000 | 0.08781500  |
| C  | -4.30075400 | 0.91619200  | -0.77013700 |
| H  | -3.55095300 | 2.91770600  | -0.71312100 |
| C  | -1.38899000 | 3.44148100  | 1.37870500  |
| H  | -0.06071700 | 2.15351700  | 0.32227800  |
| C  | -0.84771200 | 3.54282500  | -1.10094800 |
| H  | -4.78852500 | -1.16463700 | -0.74082300 |
| C  | -3.17982800 | -2.79868000 | 1.40167400  |
| H  | -1.44640900 | -2.48644700 | 0.20061300  |
| C  | -2.98533700 | -3.20149300 | -1.09806300 |
| H  | -5.28883400 | 1.21750600  | -1.10093200 |
| H  | -2.35462600 | 3.94232700  | 1.26049100  |
| H  | -1.45068700 | 2.79757800  | 2.25938300  |
| H  | -0.63332400 | 4.20896300  | 1.57167600  |

|   |             |             |             |
|---|-------------|-------------|-------------|
| H | -0.04529100 | 4.26404200  | -0.91918600 |
| H | -0.59094000 | 2.96807400  | -1.99483100 |
| H | -1.75410800 | 4.11359900  | -1.32244400 |
| H | -4.26513100 | -2.66154800 | 1.37004200  |
| H | -2.97842700 | -3.85907300 | 1.58168500  |
| H | -2.79518300 | -2.23166500 | 2.25297900  |
| H | -4.07092800 | -3.17862700 | -1.22950600 |
| H | -2.52936500 | -2.87043600 | -2.03496300 |
| H | -2.70029900 | -4.24472000 | -0.93358300 |

E) DtBuPDS derived radical with styrene:

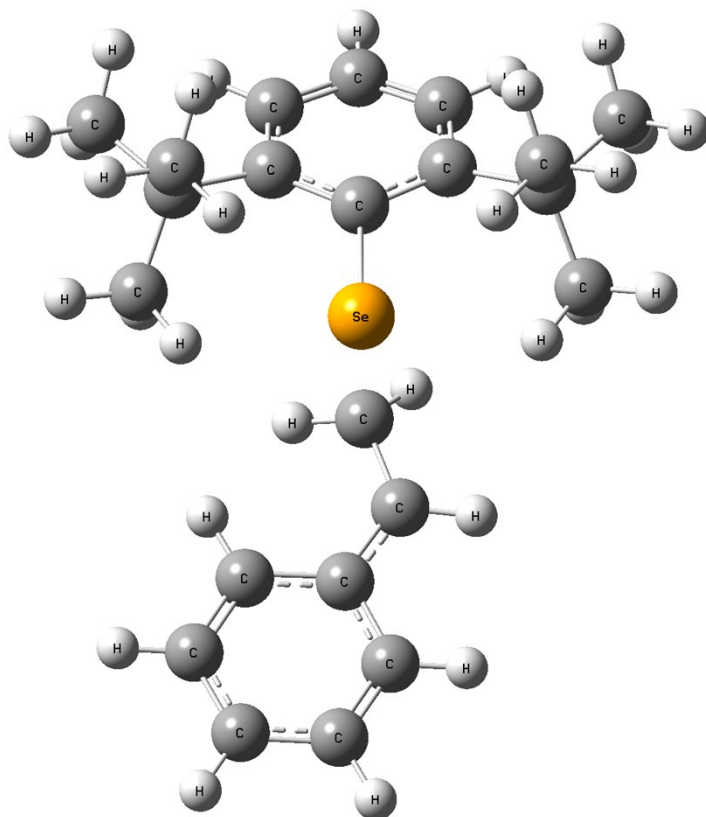

|    |             |             |             |
|----|-------------|-------------|-------------|
| C  | -5.99121200 | -1.03864000 | -0.05029000 |
| C  | -4.72593200 | -1.53232900 | -0.31601300 |
| C  | -3.61620500 | -0.66229800 | -0.50880100 |
| C  | -3.86242100 | 0.73483600  | -0.40954600 |
| C  | -5.13284400 | 1.21854500  | -0.14091300 |
| C  | -6.20749200 | 0.34146600  | 0.03929800  |
| H  | -6.81827300 | -1.72579800 | 0.09059000  |
| H  | -4.56551400 | -2.60342700 | -0.38214600 |
| H  | -3.04630700 | 1.43503700  | -0.53754500 |
| H  | -5.29276200 | 2.28874400  | -0.06765300 |
| H  | -7.19837800 | 0.72723600  | 0.24874300  |
| C  | -2.33740800 | -1.20934000 | -0.79087300 |
| H  | -2.25456500 | -2.29187500 | -0.78689400 |
| C  | -1.10326200 | -0.45244500 | -1.00783800 |
| H  | -1.25096400 | 0.55257000  | -1.39508600 |
| H  | -0.39060600 | -0.98981600 | -1.62949900 |
| Se | -0.09644500 | -0.22611000 | 0.78104900  |
| C  | 1.68774700  | 0.14135600  | 0.02531000  |
| C  | 2.04675900  | 1.48638200  | -0.29132900 |
| C  | 2.54202000  | -0.95460500 | -0.30329600 |
| C  | 3.16418300  | 1.66918100  | -1.11784200 |
| C  | 3.63956500  | -0.67898700 | -1.13089200 |
| C  | 3.92357600  | 0.60320900  | -1.56879600 |
| H  | 3.45739000  | 2.66273400  | -1.41930700 |
| H  | 4.29686000  | -1.47630300 | -1.44164600 |
| H  | 4.76650500  | 0.77736600  | -2.22893400 |
| C  | 2.40894100  | -2.41480500 | 0.23791500  |

|   |             |             |             |
|---|-------------|-------------|-------------|
| C | 1.35463600  | 2.77313200  | 0.26336100  |
| C | 3.65942400  | -3.26296400 | -0.10123300 |
| H | 4.58139700  | -2.81196700 | 0.27424300  |
| H | 3.55358800  | -4.24012300 | 0.37623700  |
| H | 3.76953300  | -3.44097600 | -1.17413600 |
| C | 2.17026700  | 4.04661900  | -0.07027600 |
| H | 1.69174300  | 4.90025000  | 0.41584800  |
| H | 3.19735800  | 3.99164500  | 0.29900000  |
| H | 2.19576400  | 4.26068000  | -1.14195900 |
| C | -0.05226600 | 3.00517800  | -0.33697900 |
| H | -0.01363000 | 2.99400200  | -1.43035300 |
| H | -0.76443200 | 2.25643000  | 0.00105400  |
| H | -0.42539300 | 3.98647800  | -0.02696500 |
| C | 1.28546300  | 2.71679800  | 1.80949000  |
| H | 0.66967000  | 1.89550800  | 2.17078500  |
| H | 2.28793800  | 2.60973600  | 2.23372300  |
| H | 0.85548600  | 3.64739900  | 2.19291800  |
| C | 2.32210400  | -2.40795800 | 1.78471800  |
| H | 3.20112400  | -1.91882800 | 2.21429300  |
| H | 1.43159000  | -1.90320300 | 2.15327800  |
| H | 2.29684800  | -3.43786500 | 2.15433200  |
| C | 1.20751200  | -3.17523400 | -0.37270900 |
| H | 0.25572800  | -2.75759200 | -0.05440700 |
| H | 1.25531900  | -3.16105600 | -1.46589700 |
| H | 1.23719800  | -4.22181500 | -0.05308400 |

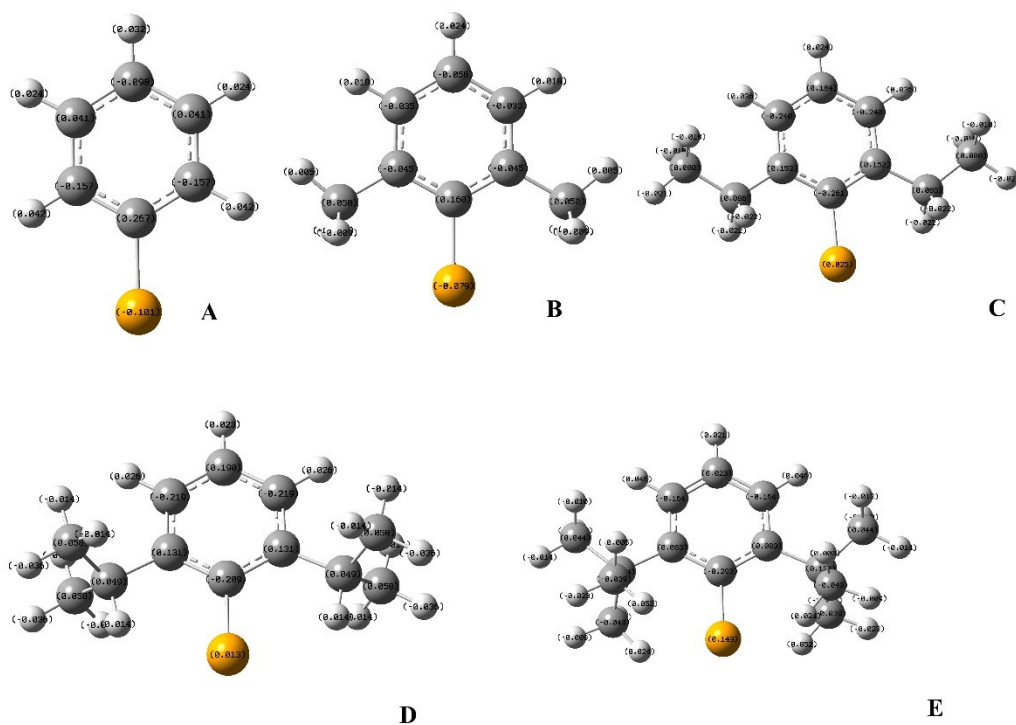

**Figure 2S.** Features of electron density distribution with number labelled in seleno centered radicals derived from A) DPDS; B) DmXDS; C) DEDPS; D) DiPDS; E) DtBuDPS. Calculated using the three parameter hybrid B3LYP density functional method with the extended basis set 6-311++G(d,p) implemented in the GAUSSIAN 09 package.

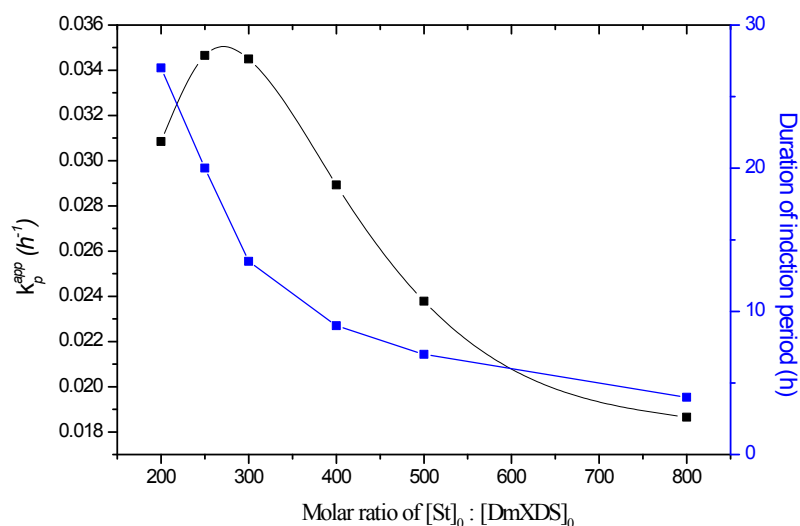

**Figure 3S.** The appearance polymerization rate and duration of induction period in polymerization of styrene with different DmXDS concentration under irradiation of 420 nm light.

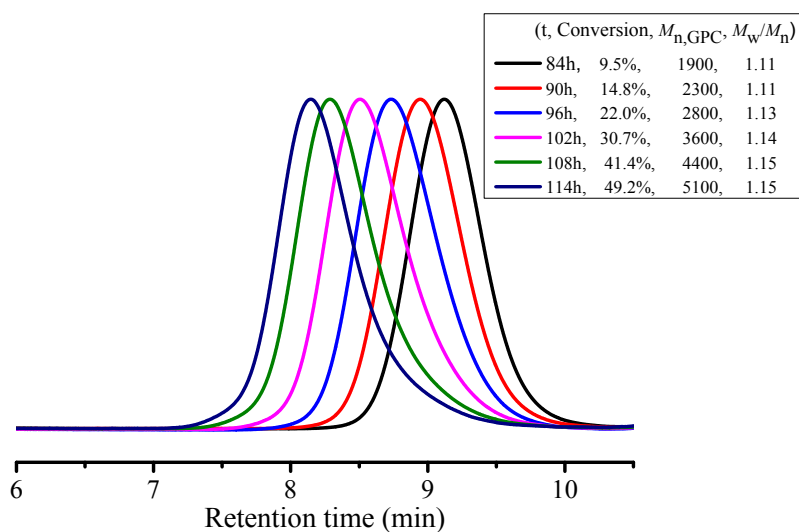

**Figure 4S.** Evolution of GPC traces of prepared PS-DmXDS obtained from DmXDS mediated polymerization of molar ratio  $[St]_0:[DmXDS]_0 = 100:1$  under bulk condition at 50°C.

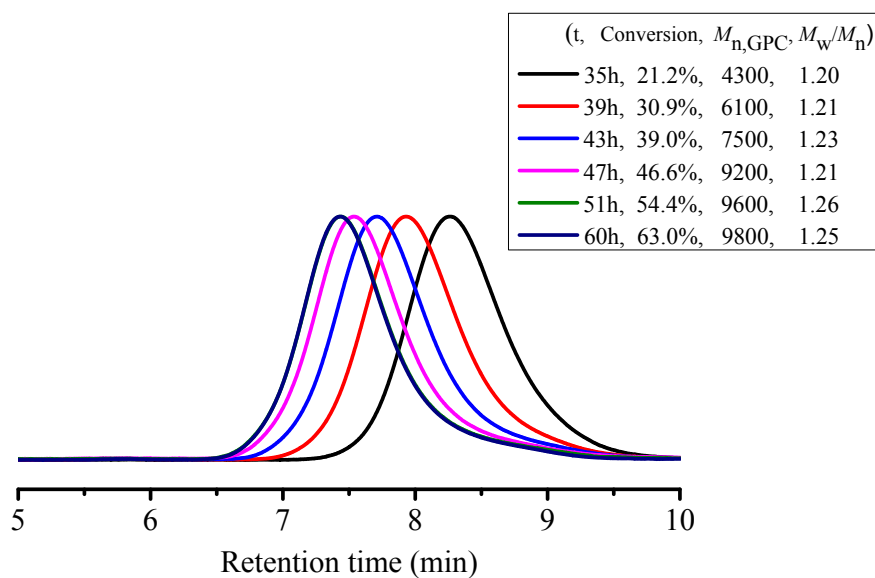

**Figure 5S.** Evolution of GPC traces of prepared PS-DmXDS obtained from DmXDS mediated polymerization of molar ratio  $[St]_0:[DmXDS]_0 = 200:1$  under bulk condition at 50°C.

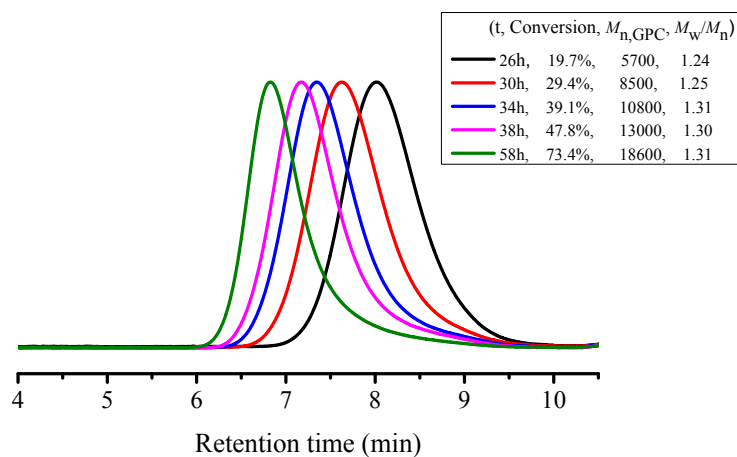

**Figure 6S.** Evolution of GPC traces of prepared PS-DmXDS obtained from DmXDS mediated polymerization of molar ratio  $[St]_0:[DmXDS]_0 = 250:1$  under bulk condition at  $50^\circ\text{C}$ .

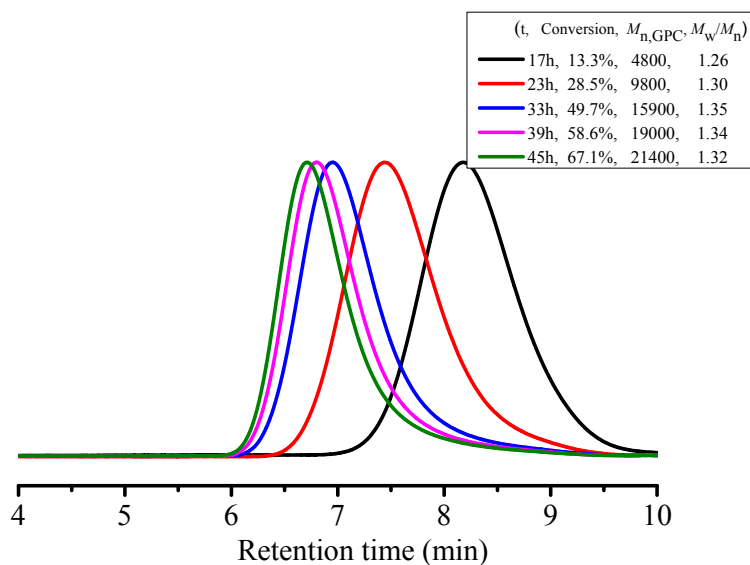

**Figure 7S.** Evolution of GPC traces of prepared PS-DmXDS obtained from DmXDS mediated polymerization of molar ratio  $[St]_0:[DmXDS]_0 = 300:1$  under bulk condition at  $50^\circ\text{C}$ .



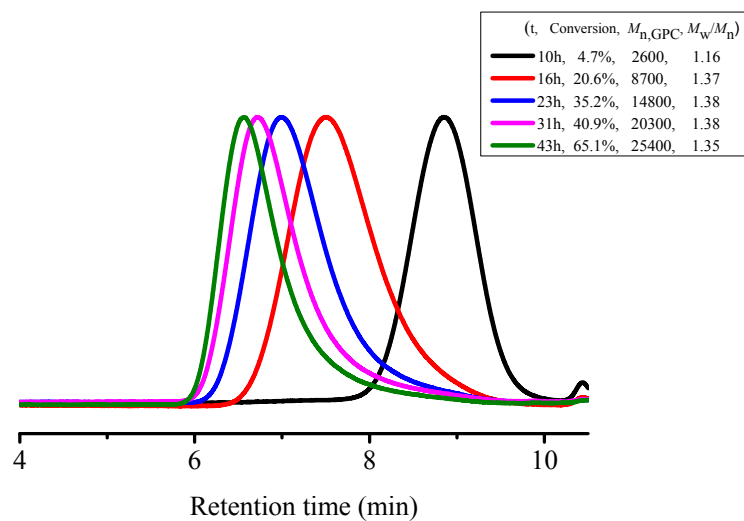

**Figure 8S.** Evolution of GPC traces of prepared PS-DmXDS obtained from DmXDS mediated polymerization of molar ratio  $[St]_0:[DmXDS]_0 = 400:1$  under bulk condition at 50°C.

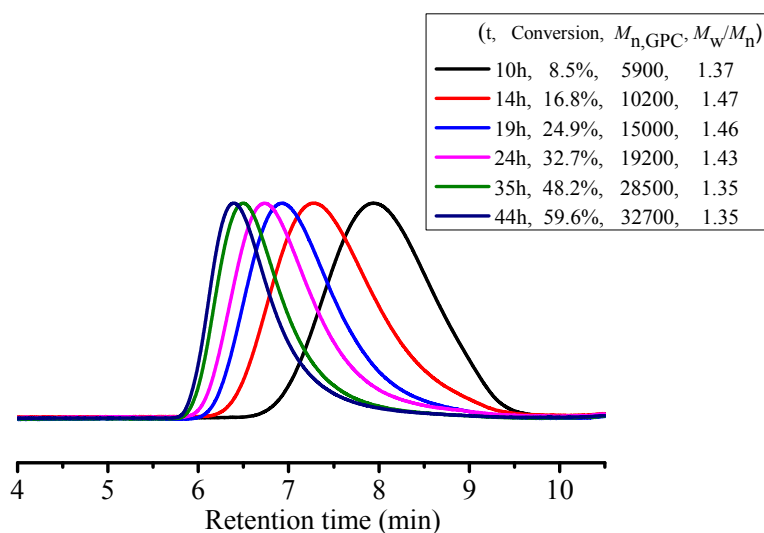

**Figure 9S.** Evolution of GPC traces of prepared PS-DmXDS obtained from DmXDS mediated polymerization of molar ratio  $[St]_0:[DmXDS]_0 = 500:1$  under bulk condition at 50°C.

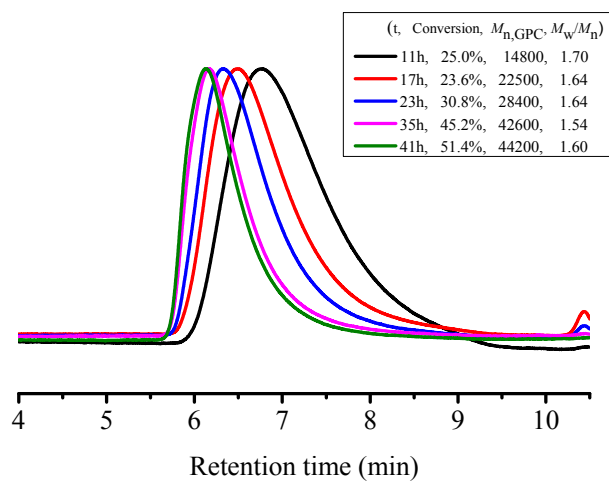

**Figure 10S.** Evolution of GPC traces of prepared PS-DmXDS obtained from DmXDS mediated polymerization of molar ratio  $[St]_0:[DmXDS]_0 = 800:1$  under bulk condition at  $50^\circ\text{C}$ .
